# Supplementary material
Source: HighWire-hosted journal article supplement (https://erj.ersjournals.com/content/55/3/2000138)
Supplement: inline-supplementary-material-1 [file inline-supplementary-material-1.pdf]

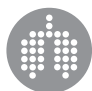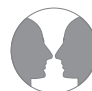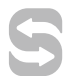

SHAREABLE PDF

# Avoiding immortal time bias in observational studies

Samy Suissa<sup>1,2</sup> and Pierre Ernst<sup>1,2</sup>

**Affiliations:** <sup>1</sup>Center for Clinical Epidemiology, Lady Davis Institute - Jewish General Hospital, Montreal, QC, Canada. <sup>2</sup>Dept of Epidemiology and Biostatistics and Dept of Medicine, McGill University, Montreal, QC, Canada.

**Correspondence:** Samy Suissa, Centre for Clinical Epidemiology, Jewish General Hospital, 3755 Cote Ste-Catherine, Montreal, Québec, Canada H3T 1E2. E-mail: samy.suissa@mcgill.ca

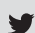

@ERSpublications

**Raymakers and colleagues used the proper analysis that avoided immortal time bias, though the wide discrepancy in results with other studies remains; further studies are needed** <http://bit.ly/2Oobgqb>

**Cite this article as:** Suissa S, Ernst P. Avoiding immortal time bias in observational studies. *Eur Respir J* 2020; 55: 2000138 [<https://doi.org/10.1183/13993003.00138-2020>].

This single-page version can be shared freely online.

## *From the authors:*

We thank A.J.N. Raymakers and co-workers for their letter, which clarifies the method of data analysis used in their study of the association between inhaled corticosteroids (ICS) and lung cancer incidence in COPD [1]. Indeed, as shown by the computing code they provide, the data analysis did consider ICS use as a time-dependent exposure, thus avoiding immortal time bias.
